# Supplementary material for: Impact of indirect transitions on valley polarization in WS2 and WSe2
Source: Royal Society of Chemistry journal article supplement (doi:10.1039/d2nr04800k), 2022-01-01
Supplement: d2nr04800k1.pdf [file d2nr04800k1.pdf]

## Supplementary Information

# Impact of indirect transitions on valley polarization in WS<sub>2</sub> and WSe<sub>2</sub>

Rasmus H. Godiksen<sup>1</sup>, Shaojun Wang<sup>1,2</sup>, T.V. Raziman<sup>1</sup>,

Jaime Gómez Rivas<sup>1</sup>, Alberto G. Curto<sup>1,3,4\*</sup>

<sup>1</sup>*Dep. Applied Physics and Institute for Photonic Integration,*

*Eindhoven University of Technology, Eindhoven, The Netherlands*

<sup>2</sup>*MOE Key Lab. of Modern Optical Technologies and Jiangsu Key Lab. of Advanced Optical Manufacturing  
Technologies, School of Optoelectronic Science and Engineering, Soochow University, Suzhou 215006, China*

<sup>3</sup>*Photonics Research Group, Ghent University-imec, Ghent, Belgium*

<sup>4</sup>*Center for Nano- and Biophotonics, Ghent University, Ghent, Belgium*

\* Corresponding author: A.G.Curto@TUE.nl

### Table of contents

|                                                                                |          |
|--------------------------------------------------------------------------------|----------|
| <b>Supplementary Section S1: Room temperature photoluminescence .....</b>      | <b>2</b> |
| Resonant excitation of bilayer WSe <sub>2</sub> .....                          | 2        |
| Thickness-dependent polarization.....                                          | 2        |
| <b>Supplementary Section S2: Temperature-dependent photoluminescence .....</b> | <b>6</b> |
| Bilayer photoluminescence spectra.....                                         | 6        |
| Evidence of a dark ground state in bilayer WSe <sub>2</sub> .....              | 8        |
| Temperature-dependent polarization in multilayer WSe <sub>2</sub> .....        | 10       |

## Supplementary Section S1: Room temperature photoluminescence

### 1. Resonant excitation of bilayer WSe<sub>2</sub>

Throughout our study, we report polarization values measured with excitation at a constant photon energy of 2.040 eV, which is close to resonance for bilayer WSe<sub>2</sub>. Here, we check that bilayer WSe<sub>2</sub> does not show spin-valley polarization either under resonant excitation conditions (Supplementary Figure S1). We used an excitation energy of 1.681 eV, which is close to the WSe<sub>2</sub> bilayer K-K exciton emission around 1.62 eV.

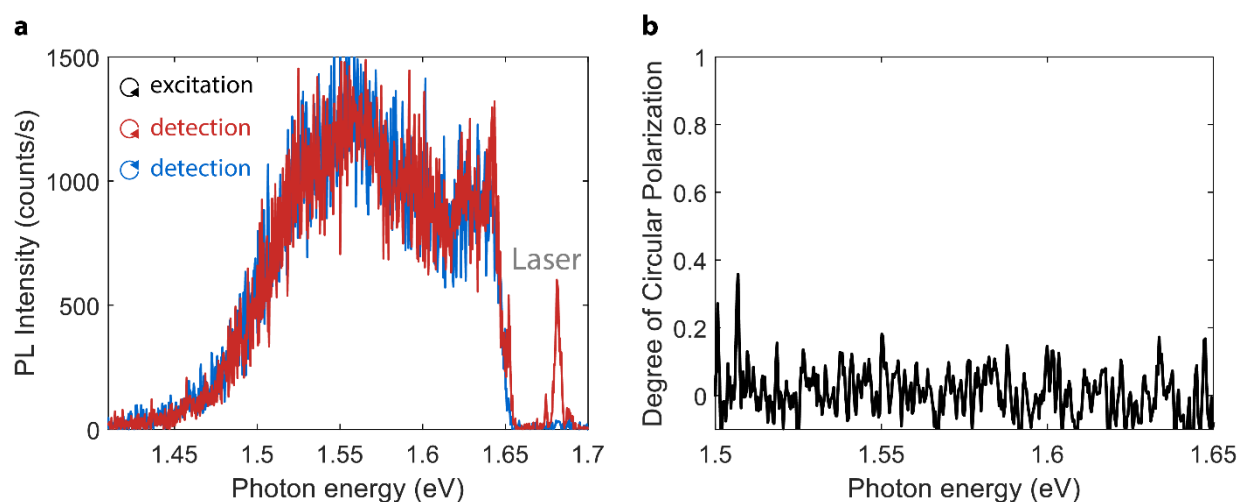

**Supplementary Figure S1.** **a**, Polarization-resolved PL spectrum for bilayer WSe<sub>2</sub> under near-resonant excitation (1.681 eV) at room temperature. **b**, Degree of circular polarization as a function of photon energy. No DOCP is measurable.

### 2. Thickness-dependent polarization

We determine the thickness of our WS<sub>2</sub> and WSe<sub>2</sub> samples by using a combination of reflection contrast microscopy, atomic force microscopy, and photoluminescence measurements. Similarly, for both WS<sub>2</sub> and WSe<sub>2</sub>, the monolayers show bright emission due to their direct band gap. At room temperature, their emission spectrum shows a single peak. When increasing the thickness, a second peak emerges, which shifts to lower energy with an increasing layer thickness

(Supplementary Figure S2). Only WS<sub>2</sub> shows an increase in the DOCP with thickness, whereas in WSe<sub>2</sub> the emission remains unpolarized for all thicknesses when excited with 2.04 eV (Supplementary Figure S3) and 1.796 eV (Supplementary Figure S4).

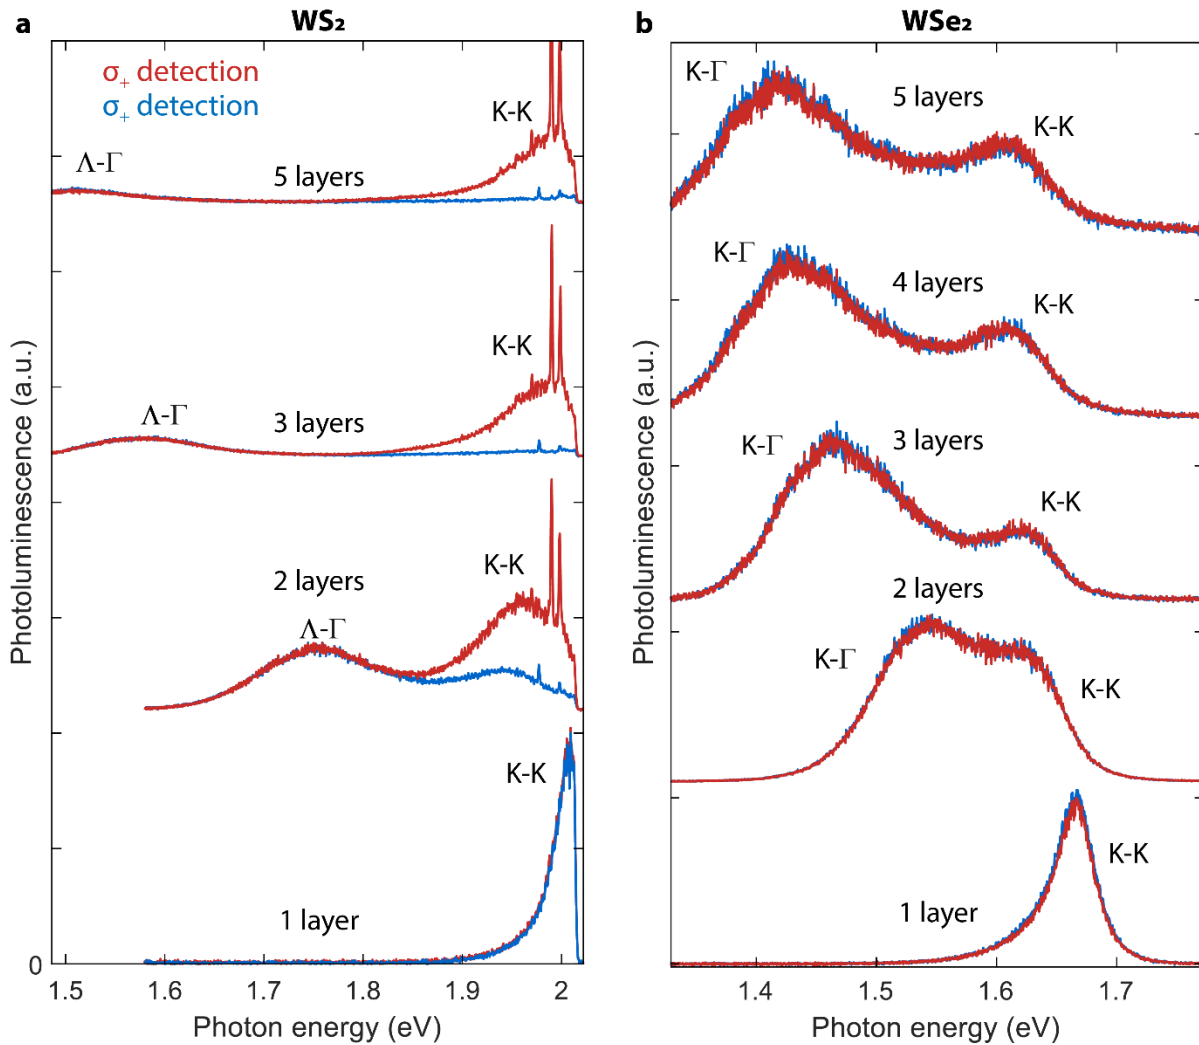

**Supplementary Figure S2.** Polarization-resolved PL spectra at room temperature for different thicknesses. **a**, WS<sub>2</sub>. **b**, WSe<sub>2</sub>. Spectra are vertically shifted by a constant for clarity.

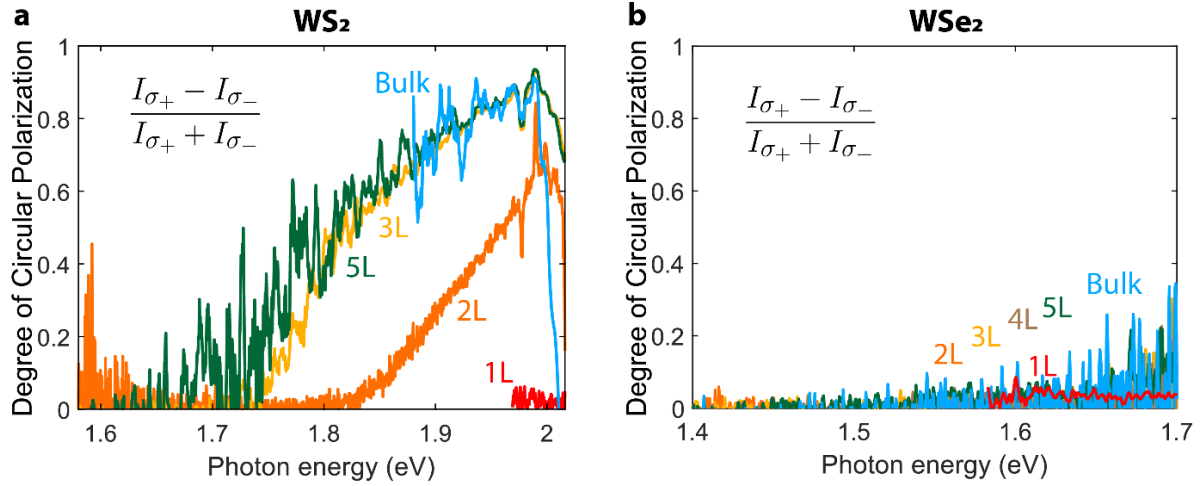

**Supplementary Figure S3.** Degree of circular polarization at room temperature as a function of emission wavelength for a set of different thicknesses for **a**, WS<sub>2</sub>, and **b**, WSe<sub>2</sub>.

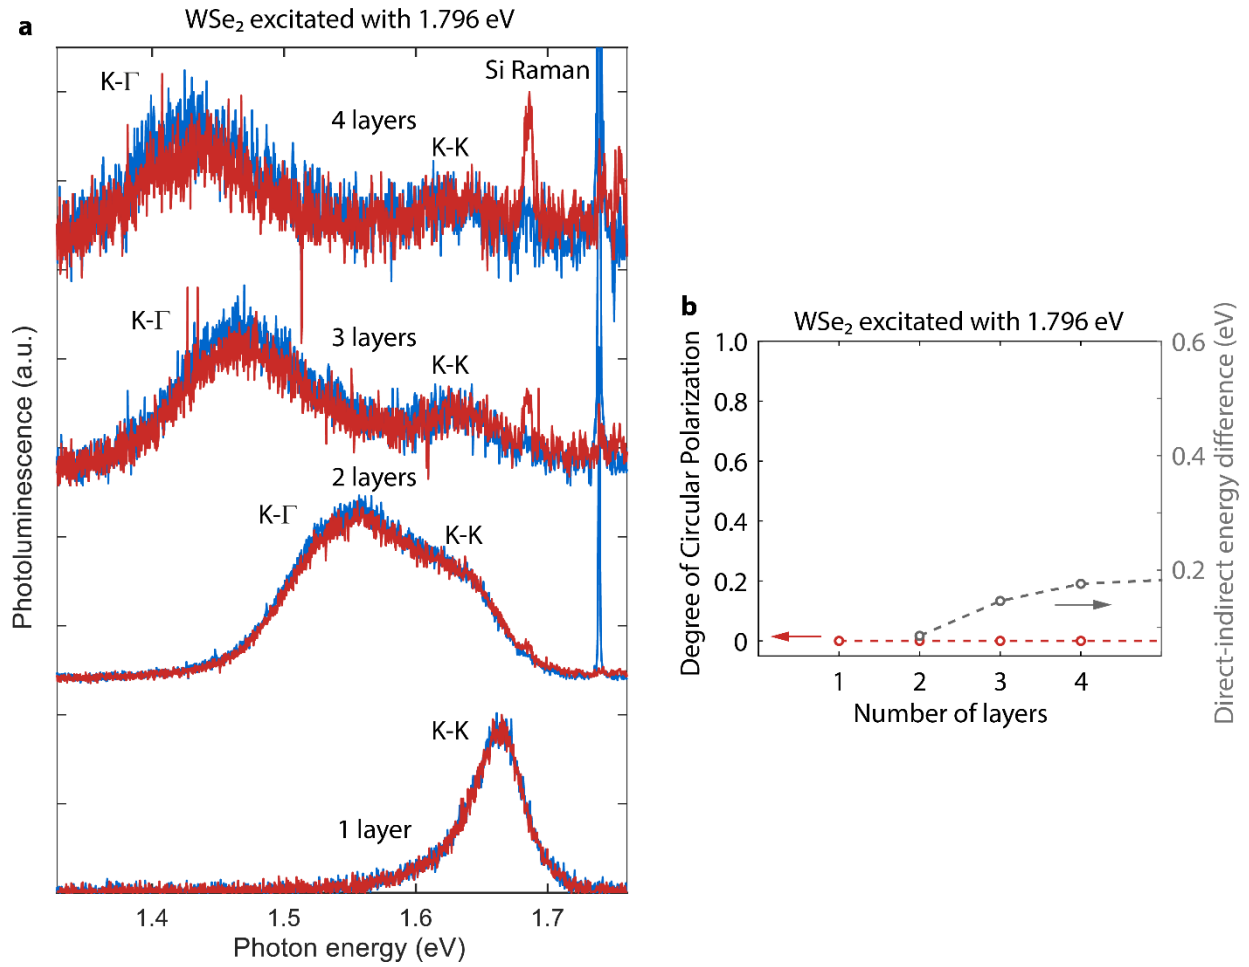

**Supplementary Figure S4.** Polarization-resolved PL spectra at room temperature for different thicknesses of WSe<sub>2</sub> excited with 1.796 eV. **a**, Thickness dependent spectra. **b**, Thickness vs the DOCP and the direct-indirect energy difference for the spectra in **a**.

## Supplementary Section S2: Temperature-dependent photoluminescence

### 1. Bilayer photoluminescence spectra

When the temperature decreases, the two photoluminescence peaks shift with temperature (Supplementary Figure S4). In bilayer  $\text{WS}_2$ , the polarization also increases. However, in bilayer  $\text{WSe}_2$ , polarization only appears below  $T = 160$  K (Supplementary Figure S5).

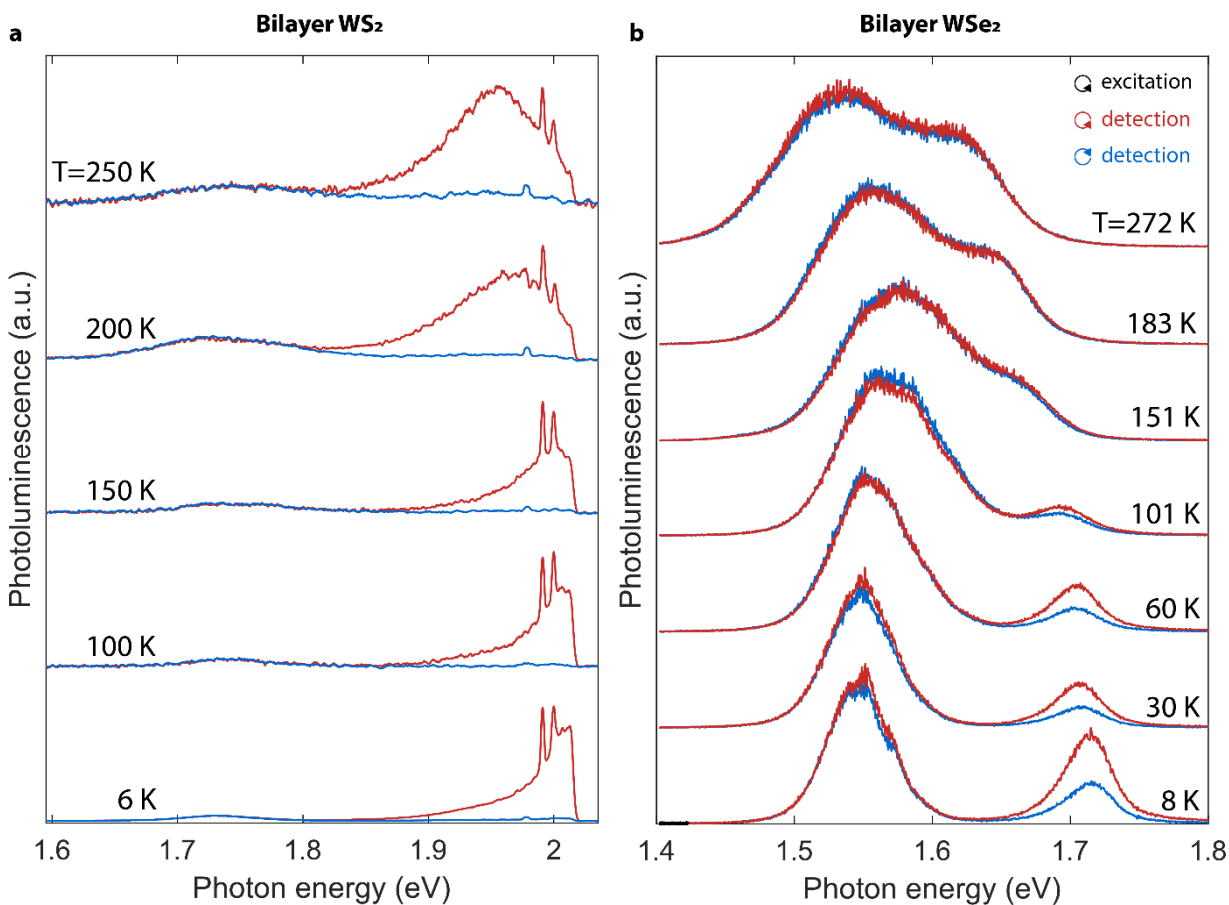

**Supplementary Figure S5.** Polarization-resolved PL spectra at different temperatures for bilayer samples. **a**,  $\text{WS}_2$ . **b**,  $\text{WSe}_2$ . Spectra are vertically shifted by a constant for clarity.

**Supplementary Table S1.** Fitting parameters obtained using Equation 2 in the main text in Figure 3. We contained the factor of 2 in the denominator of Equation 2 in the fitting parameter,  $c$ .

| Material         | $c$   | $\Delta E$ (meV) |
|------------------|-------|------------------|
| WS <sub>2</sub>  | 0.12  | 74.6             |
| WSe <sub>2</sub> | 0.076 | 72.5             |

## 2. Fitting using the O'Donnell equation

We fit the peak position as a function of temperature using two equations. Fitting using the Varshni equation<sup>1</sup> was presented in the main text. Here, we fit the peak position using the O'Donnell equation<sup>1</sup>

$$E_g(T) = E_g(0) - S\langle\hbar\omega\rangle[\coth(\langle\hbar\omega\rangle/2k_B T) - 1] \quad (\text{S1})$$

where  $T$  is the temperature,  $E_g(0)$  is the excitonic band gap,  $S$  is the Huang-Rhys factor,  $\langle\hbar\omega\rangle$ , is an average phonon energy, and  $k_B$  is the Boltzmann constant. The obtained fitting parameters are listed in Supplementary Table S2. Fitting using the O'Donnell equation yields as good a fit as with the Varshni equation, i.e.,  $R^2 = 0.9999$  when comparing the two fits. The main variation one might encounter between these two fitting methods will be expressed mainly in the range  $T=0-20$  K, where we do not have several data points, as the band gap energy varies less in this range. The O'Donnell equation has a more profound theoretical background, and its fitting parameters are more well defined<sup>1</sup>. The Huang-Rhys factor,  $S$ , describes the exciton-phonon coupling strength of a certain transition. Comparing the values for each transition in Supplementary Table S2, we note that the exciton-phonon coupling strength is much larger for transitions that involve electrons in the K-valley compared to the  $\Lambda$ -valley. Similarly, the average phonon energy is also smaller for  $\Lambda$ - $\Gamma$  excitons, suggesting that  $\Lambda$ - $\Gamma$  excitons are more resistant to scattering by phonons.

**Supplementary Table S2.** Fitting parameters obtained using Equation S1 with the experimental data in Figure 3a-b.

| Material / Transition |                      | $E_g(0)$ (eV) | $S$ (-) | $\langle \hbar\omega \rangle$ (meV) |
|-----------------------|----------------------|---------------|---------|-------------------------------------|
| WS <sub>2</sub>       | K-K                  | 2.045         | 2.979   | 14.6                                |
|                       | $\Lambda$ - $\Gamma$ | 1.737         | 0.997   | 2.0                                 |
| WSe <sub>2</sub>      | K-K                  | 1.713         | 2.957   | 16.5                                |
|                       | K- $\Gamma$          | 1.600         | 1.791   | 12.4                                |
|                       | $\Lambda$ - $\Gamma$ | 1.546         | 0.991   | 6.3                                 |

### 3. Evidence of a dark ground state in bilayer WSe<sub>2</sub>

In W-based monolayers, the dark excitons lie lower in energy than the bright excitons and transitions between the lowest conduction band and the top valence band at K is spin-forbidden (dark K-K exciton) due to spin splitting<sup>2</sup>. As evidence for bright-dark excitons in bilayer WSe<sub>2</sub>, we observe a decrease of the K-K intensity with decreasing temperature consistent with reduced thermalization from dark to bright excitons<sup>2-4</sup> (Supplementary Figure S6). We fit the measured integrated PL intensity as a function of temperature to the expression  $I_{PL}(T)/I_{PL}(0) - 1 = C \exp(-E_D/k_B T)$ , where  $I_{PL}(T)$  is the measured intensity as a function of temperature,  $I_{PL}(0)$  is the intensity at  $T = 0$  K,  $C$  is a constant,  $k_B$  is the Boltzmann constant, and  $E_D$  is the characteristic energy barrier that defines the slope of the emission. From the fit, we obtain  $E_D = 37.9$  meV, which is in good agreement with the bright-dark exciton splitting in monolayer WSe<sub>2</sub><sup>5</sup>. We expect a similar value for bilayer WSe<sub>2</sub> due to the limited effect of layer-layer interactions on the band structure near the K-point of the Brillouin zone.



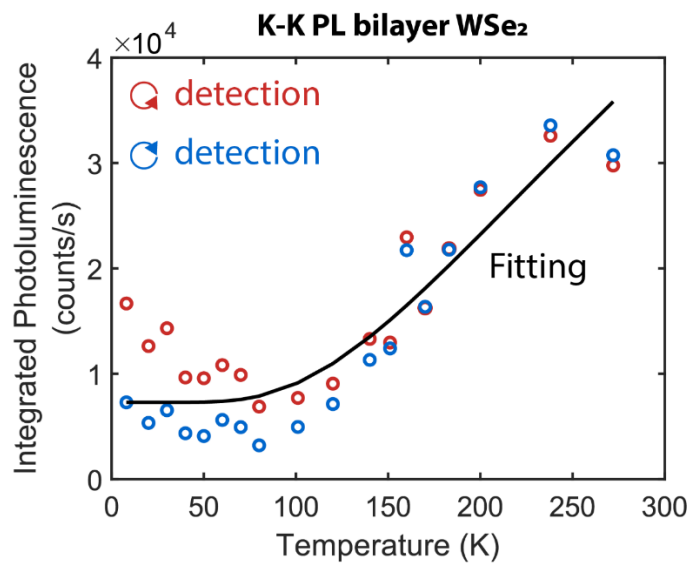

**Supplementary Figure S6.** Spectrally integrated PL of the A exciton emission as a function of temperature for both circular polarizations when excited with a 2.04 eV laser. The drop in emission intensity with temperature is consistent with a dark exciton ground state. The fitting is described in the text.

#### 4. Temperature-dependent polarization with varying thickness in WSe<sub>2</sub>

For a fixed temperature, if we increase the WSe<sub>2</sub> thickness to three or four layers, the K- $\Lambda$  conduction band difference should become smaller. Similarly, the onset of an increase in DOCP should occur at a higher temperature compared to a bilayer. We confirm this trend by measuring the emission DOCP for three and four layers of WSe<sub>2</sub> and by comparing it as a function of temperature to that of a bilayer (Supplementary Figure S7).

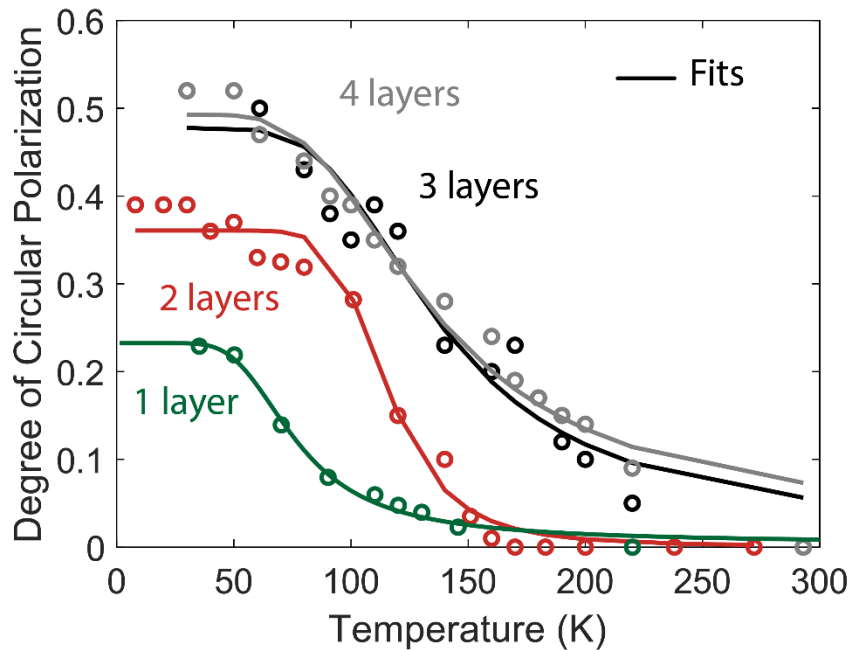

**Supplementary Figure S7.** Temperature-dependent DOCP measurements for 1, 2, 3, and 4 layers of WSe<sub>2</sub> showing an increase in the onset temperature of DOCP with increasing layer thickness. The 2, 3, and 4 layer data was acquired using 2.04 eV excitation. The monolayer data was acquired using 1.796 eV excitation. The fits are made by assuming a Boltzmann distribution for the K-K' intervalley scattering, see details in the main text.

#### References

1. O'Donnell, K. P. & Chen, X. Temperature dependence of semiconductor band gaps. *Appl. Phys. Lett.* **58**, 2924 (1991).
2. Zhang, X.-X., You, Y., Yang, S., Zhao, F. & Heinz, T. F. Experimental Evidence for Dark Excitons in Monolayer WSe<sub>2</sub>. *Phys. Rev. Lett.* **115**, 257403 (2015).

3. Malic, E. *et al.* Dark excitons in transition metal dichalcogenides. *Phys. Rev. Mater.* **2**, 014002 (2018).
4. Zhang, M., Fu, J., Dias, A. C. & Qu, F. Optically dark excitonic states mediated exciton and biexciton valley dynamics in monolayer WSe<sub>2</sub>. *J. Phys. Condens. Matter* **30**, 265502 (2018).
5. Wang, G. *et al.* In-Plane Propagation of Light in Transition Metal Dichalcogenide Monolayers: Optical Selection Rules. *Phys. Rev. Lett.* **119**, 047401 (2017).
